# Supplementary material
Source: publisher figshare collection journal article supplement (https://karger.figshare.com/ndownloader/files/23100026)
Supplement: Supplementary file 1 [file 23100026]

**Table S4** Quality assessment for outcomes by GRADE system.

| **Primary outcome** | | **No. of Studies** | **No. of Patients** | | **Differencesa（95%CI）** | **Quality Assessment** | | | | | **Quality** |
| --- | --- | --- | --- | --- | --- | --- | --- | --- | --- | --- | --- |
| **PS** | **PF** | **Risk of Bias** | **Inconsistency** | **Indirectness** | **Imprecision** | **Publication Bias** |
| **Survivial** | |  |  |  |  |  |  |  |  |  |  |
|  | OS | 3 | 834 | 715 | 0.94 [0.84, 1.06] | Low | No inconsistency | No indirectness | No imprecision | Reporting bias(-1) | MODERATE |
|  | PFS | 3 | 834 | 715 | 0.97 [0.87, 1.09] | Low | No inconsistency | No indirectness | No imprecision | Unlikely | HIGH |
|  | TTF | 2 | 714 | 599 | 0.86 [0.77, 0.97] | Low | No inconsistency | No indirectness | No imprecision | Unlikely | HIGH |
|  | ORR | 6 | 963 | 843 | 1.26 [0.96, 1.67] | Low | No inconsistency | No indirectness | No imprecision | Unlikely | HIGH |
|  | DCR | 2 | 55 | 55 | 1.11 [0.86, 1.43] | Serious(-1) | No inconsistency | No indirectness | No imprecision | Unlikely | MODERATE |
| **Adverse effects** | |  |  |  |  |  |  |  |  |  |  |
|  | Total | 2 | 751 | 626 | 0.99 [0.98, 1.01] | Low | No inconsistency | No indirectness | No imprecision | Unlikely | HIGH |
|  | Grade ≥ 3 | 3 | 871 | 742 | 1.08 [0.82, 1.41] | Low | Very serious(-2) | No indirectness | No imprecision | Unlikely | LOW |
| **Subgroup analysis** | |  |  |  |  |  |  |  |  |  |  |
|  | Nausea | 3 | 871 | 742 | 0.92 [0.85, 1.00] | Low | No inconsistency | No indirectness | No imprecision | Unlikely | HIGH |
|  | Grade ≥ 3 stomatitis | 3 | 871 | 742 | 0.11 [0.05, 0.22] | Low | No inconsistency | No indirectness | No imprecision | Unlikely | HIGH |
|  | Grade ≥ 3 hypokalemia | 3 | 871 | 742 | 0.37 [0.24, 0.58] | Low | No inconsistency | No indirectness | No imprecision | Unlikely | HIGH |

**Note:** OS: overall survival; PFS: progression-free survival; TTF: time to failure; ORR: objective response rate; DCR: disease control rate; PS: Platinum/S-1; PF: platinum/5-fluorouracil; CI: confidence intervals.

a Differences: HR for OS, PFS and TTF; RR for ORR, DCR and Adverse effects.
